# Supplementary material
Source: Springer Nature journal article supplement (https://www.springermedizin.de/resource/supplementary/13075_2007_2119_MOESM6_ESM.pdf/9691348)

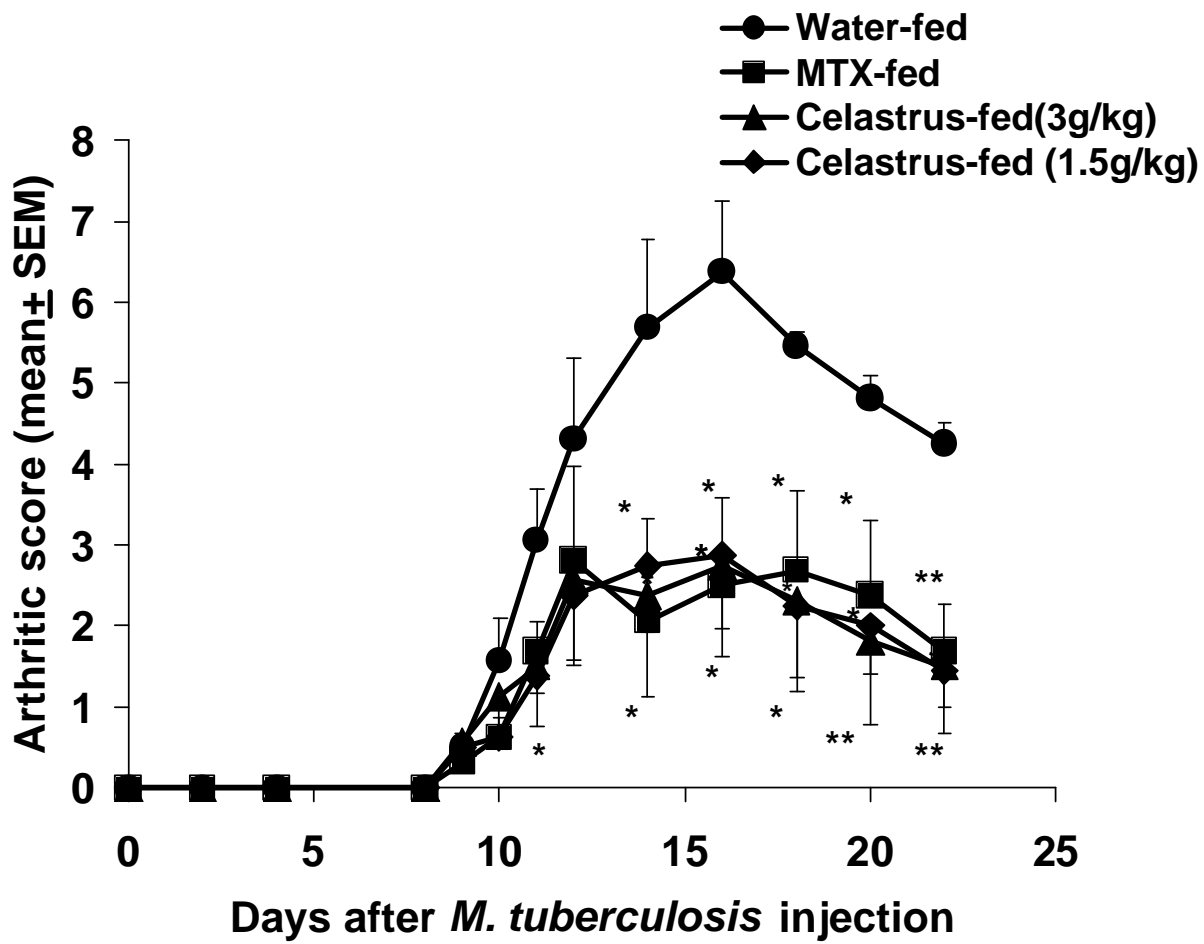

Figure 6

Supplement: MOESM6 [file 9691348]
